# Supplementary material for: Multi-spectroscopic monitoring of molecular interactions between an amino acid-functionalized ionic liquid and potential anti-Alzheimer's drugs
Source: Royal Society of Chemistry journal article supplement (doi:10.1039/d0ra06323a), 2020-01-01
Supplement: d0ra06323a1.pdf [file d0ra06323a1.pdf]

## Supporting Information

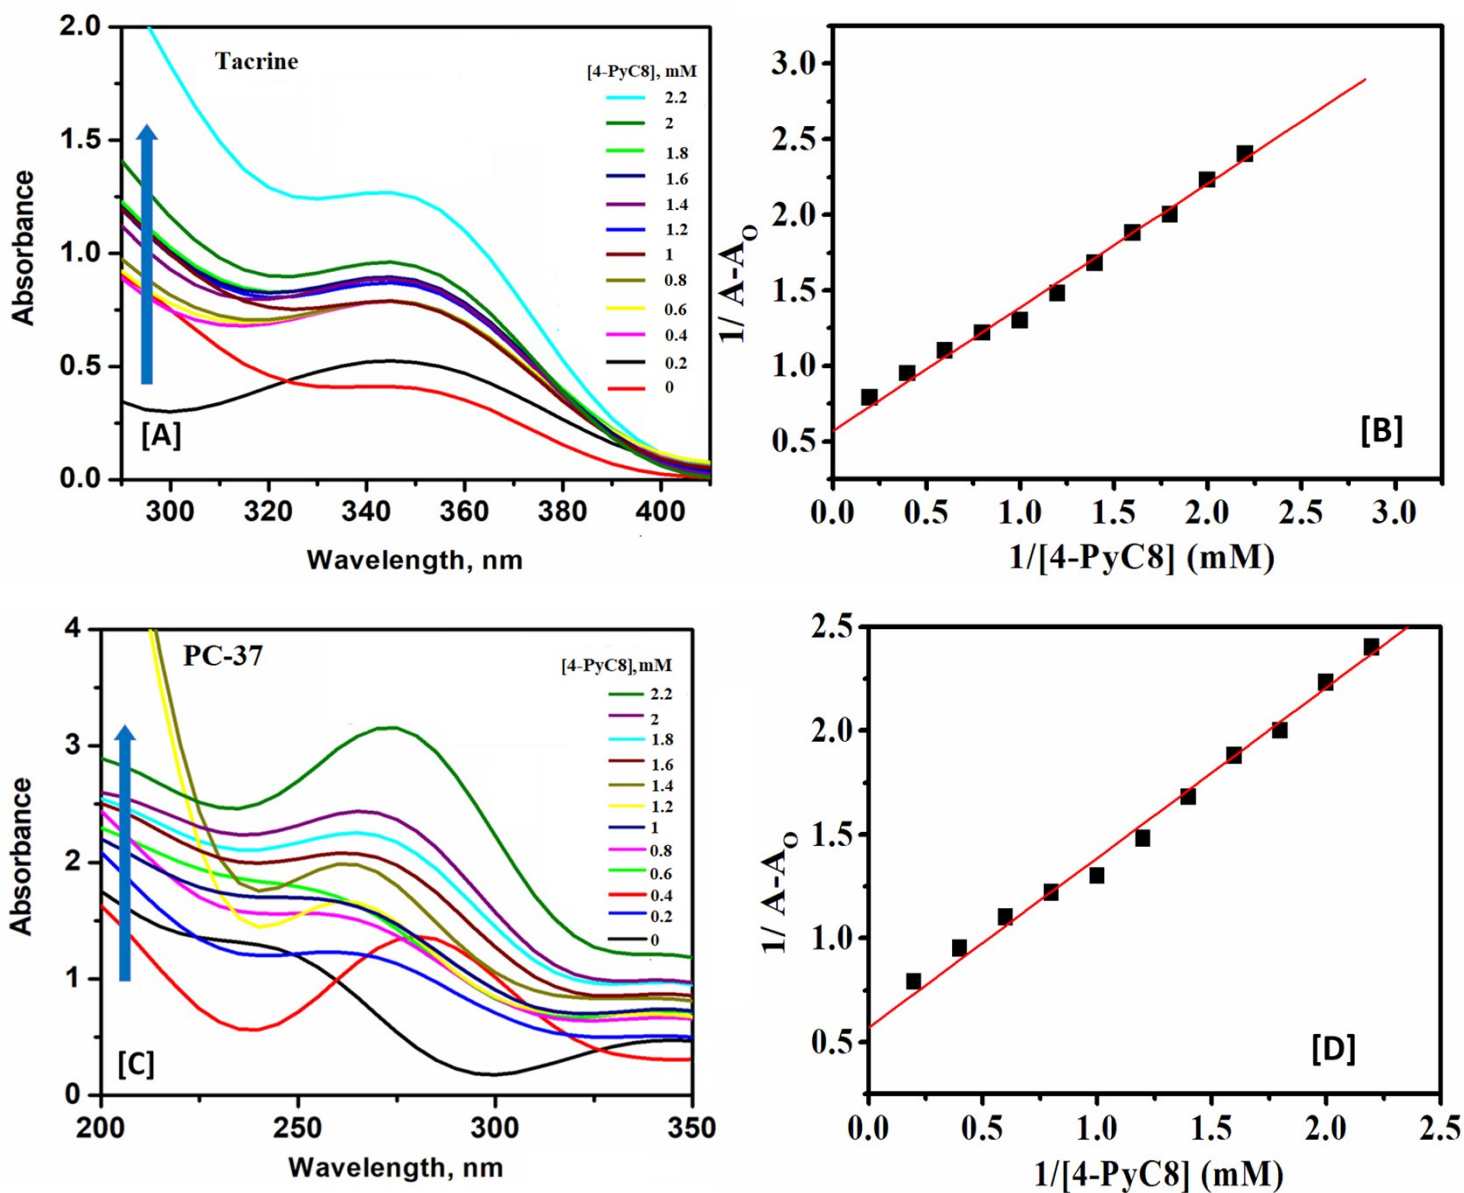

**Fig. S1** Absorbance spectra (A and C) and Benesi-Hildebrand plots (B and D) for the interaction of anti-Alzheimer's drugs (1.0 mM) (A-B) tacrine and (C-D) PC-37 in the presence of increasing concentration of 4-PyC8 at physiological conditions.

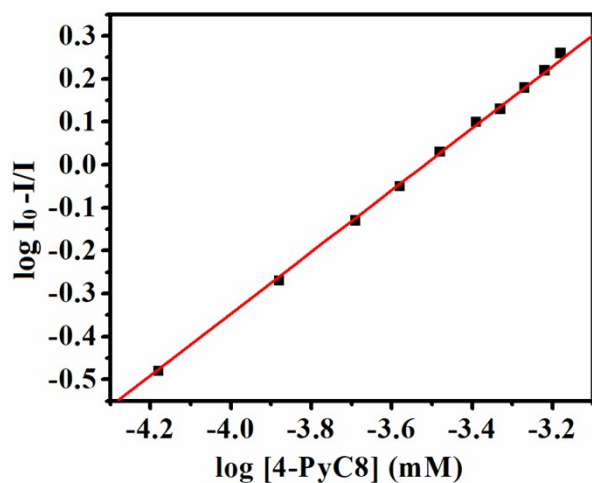

(A)

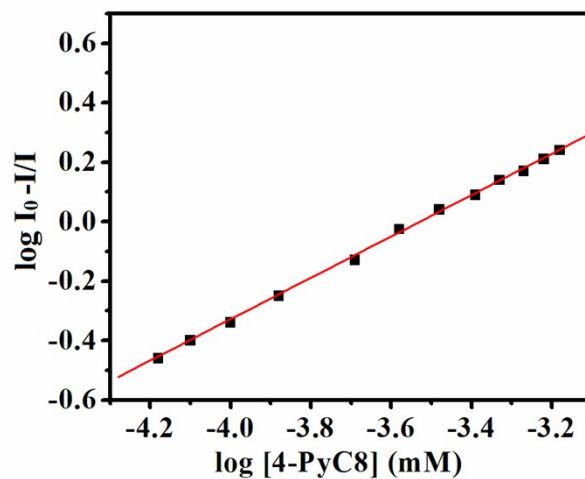

(B)

**Fig S2.** Plots of  $\log [(I_0 - I)/I]$  against  $\log [4\text{-PyC8}]$  respectively for (A) tacrine and (B) PC-37 at different concentrations of 4-PyC8 (0.1 mM) at pH 7.4 and 310 K

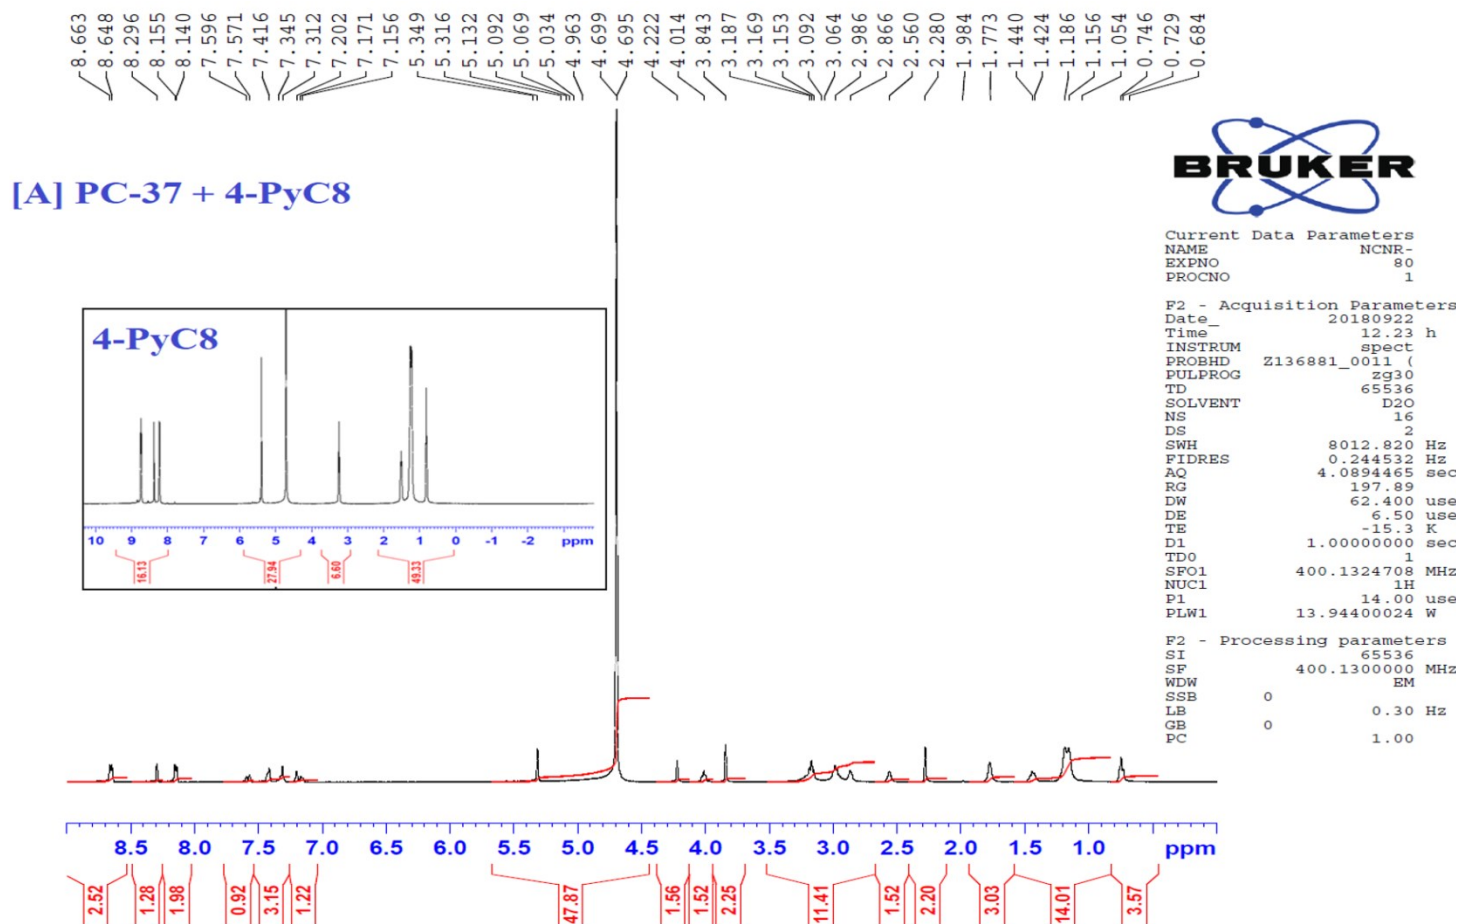

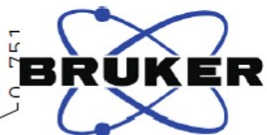

Current Data Parameters  
 NAME NCNR-  
 EXPNO 50  
 PROCNO 1

F2 - Acquisition Parameters  
 Date\_ 20180915  
 Time\_ 16.57 h  
 INSTRUM spect  
 PROBHD Z136881\_0011 (  
 PULPROG zg30  
 TD 65536  
 SOLVENT D2O  
 NS 16  
 DS 2  
 SWH 8012.820 Hz  
 FIDRES 0.244532 Hz  
 AQ 4.0894465 sec  
 RG 197.89  
 DW 62.400 usec  
 DE 6.50 usec  
 TE -15.3 K  
 D1 1.00000000 sec  
 TD0 1  
 SFO1 400.1324708 MHz  
 NUC1 1H  
 P1 14.00 usec  
 PLW1 13.94400024 W

F2 - Processing parameters  
 SI 65536  
 SF 400.1300000 MHz  
 WDW EM  
 SSB 0  
 LB 0.30 Hz  
 GB 0  
 PC 1.00

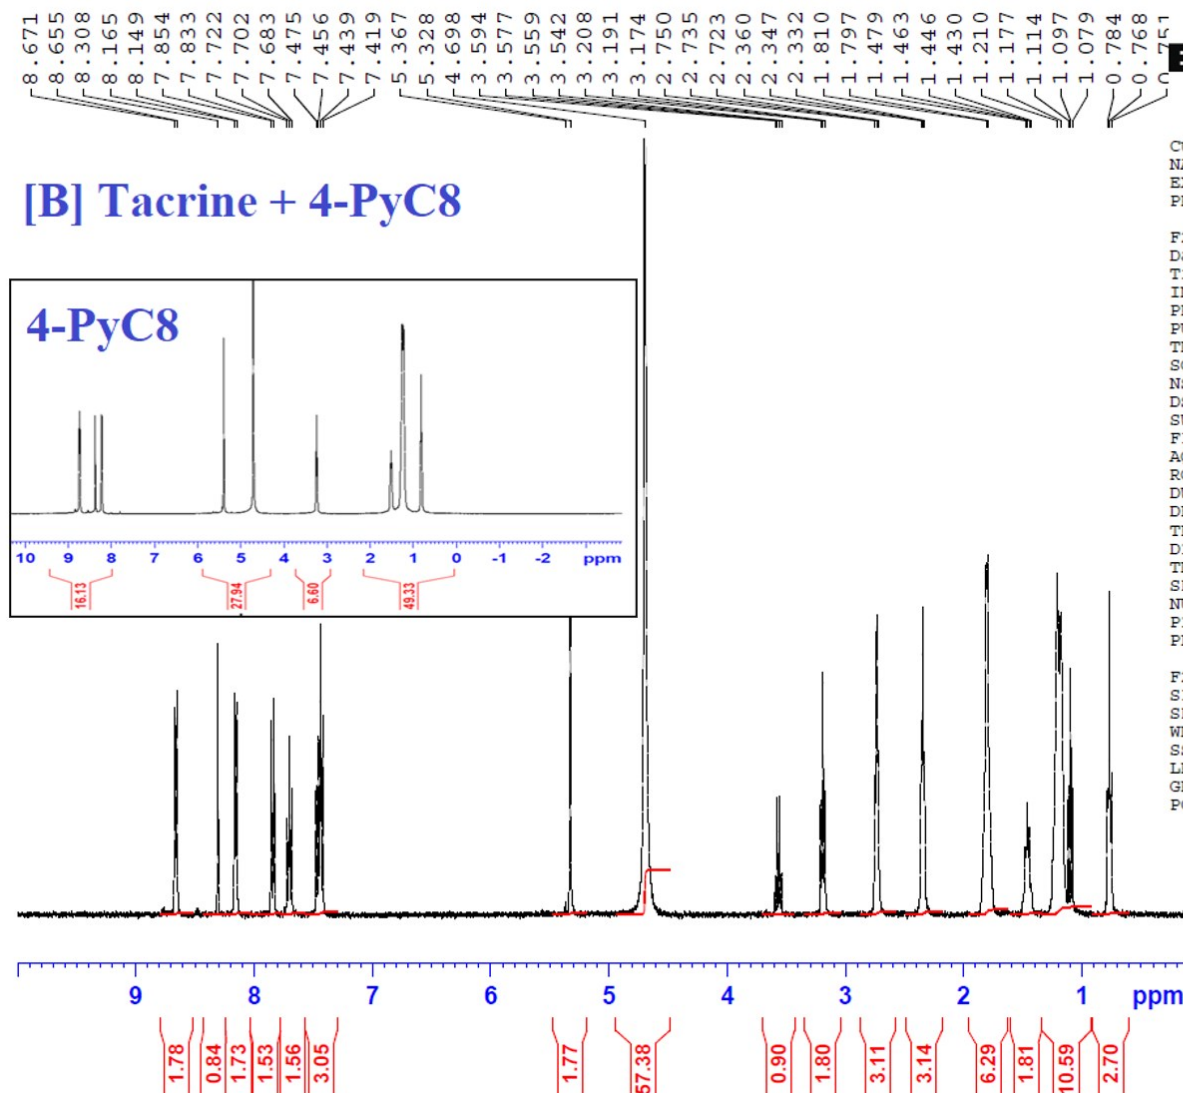

Fig. S3  $^1\text{H}$  NMR spectra of complexes of [A] PC-37+4-PyC8 [B] Tacrine+4-PyC8.
